# Supplementary material
Source: PubMed Central journal article supplement (PMC3360511)
Supplement: Supp_Data.pdf [file Supp_Data.pdf]

## Supplementary Data

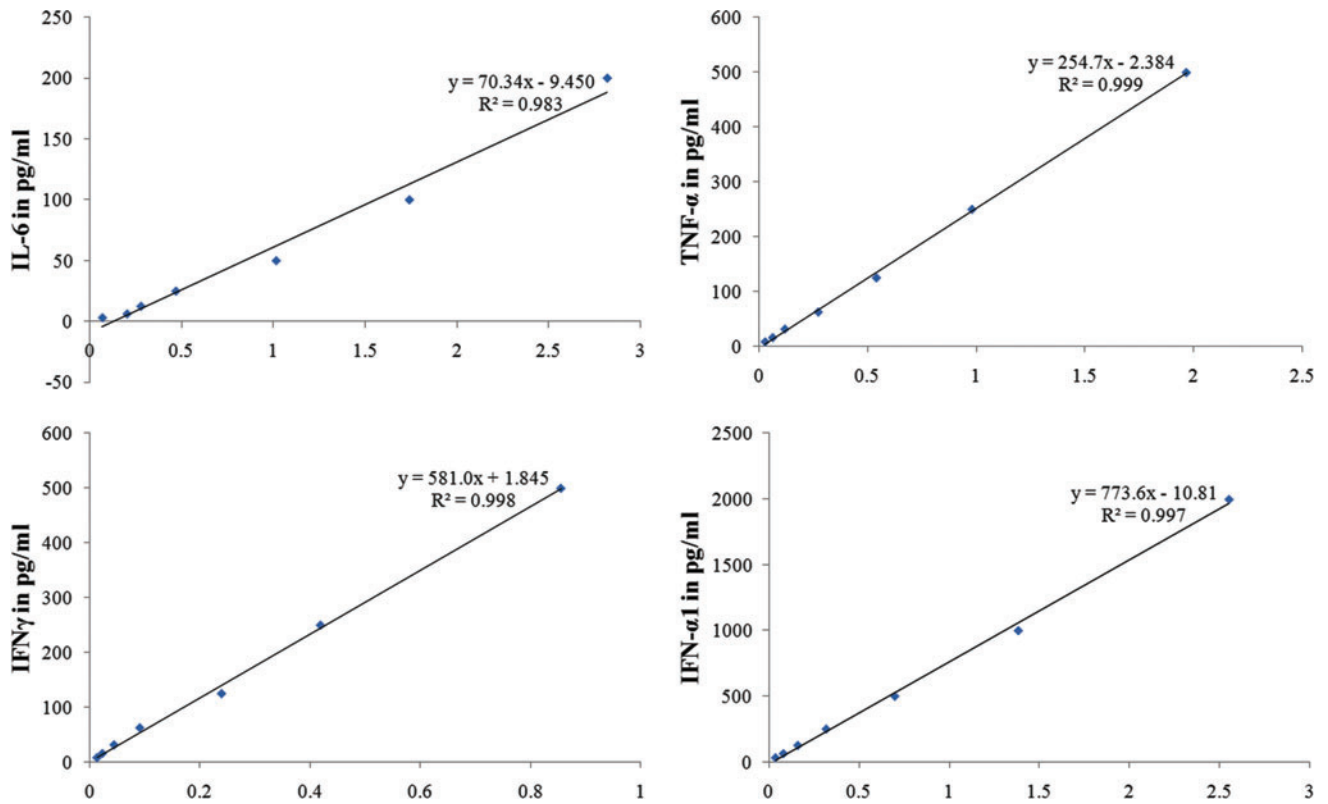

**SUPPLEMENTARY FIG. S1.** Standard curves for cytokine analysis. Standard dilutions and cell supernatant or lysate were assayed simultaneously in triplicate.
